# Supplementary material for: A facile room temperature chemical transformation approach for binder-free thin film formation of Ag2Te and lithiation/delithiation chemistry of the film
Source: Royal Society of Chemistry journal article supplement (doi:10.1039/c6dt03038f), 2016-01-01
Supplement: c6dt03038f1.pdf [file c6dt03038f1.pdf]

## **Supplementary information (ESI)**

### **A facile room temperature chemical transformation approach for binder-free thin film formation of Ag<sub>2</sub>Te and lithiation/delithiation chemistry of the film**

Eun-Kyung Kim<sup>a</sup>, Dasom Park<sup>b</sup>, Nabeen K. Shrestha<sup>a,\*</sup>, Jinho Chang<sup>b</sup>, Cheol-Woo Yi<sup>b</sup>, Sung-Hwan Han<sup>a,\*</sup>

---

<sup>a</sup>*Institute of Materials Design, Department of Chemistry, Hanyang University, Seongdong-gu, 133791 Seoul, Republic of Korea.*

*E-mail: [nabeenkshrestha@hotmail.com](mailto:nabeenkshrestha@hotmail.com) (N.K. Shrestha) ; [shhan@hanyang.ac.kr](mailto:shhan@hanyang.ac.kr) (S.-H. Han).*

<sup>b</sup>*Department of Chemistry, Sungshin W. University, 55 Dobong-ro, 76ga-gil, Gangbuk-gu, Seoul 142-732, Republic of Korea.*

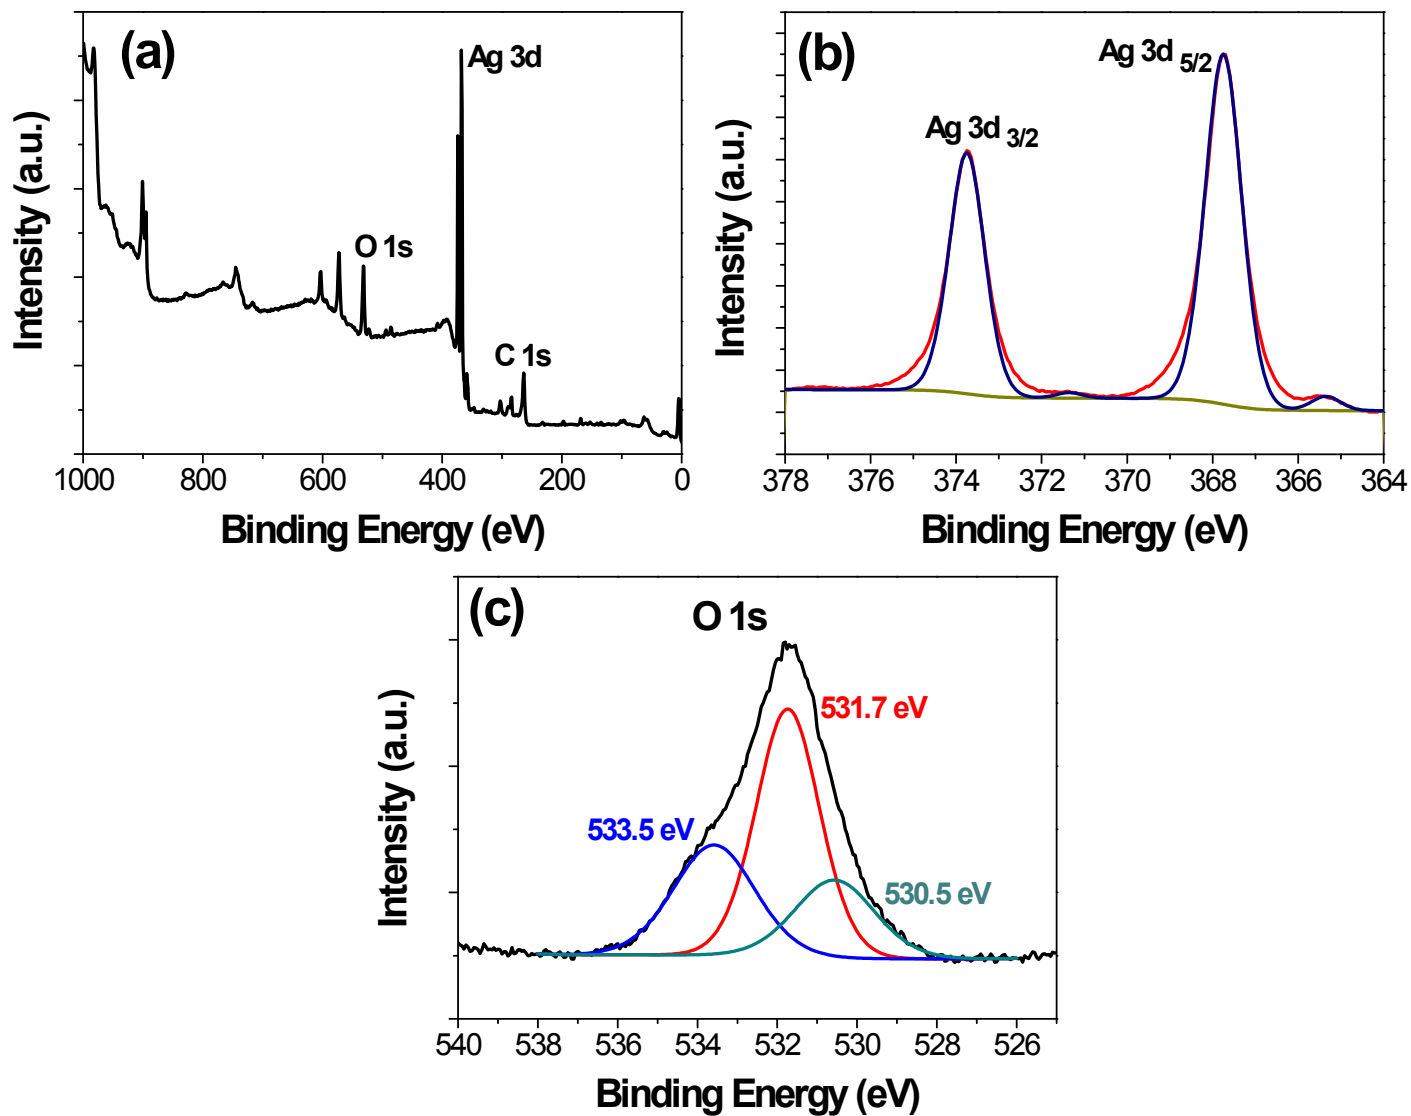

**Fig. S1.** XPS spectra of Ag/Ag<sub>x</sub>O film. (a) Survey spectrum, (b) Ag 3d core level spectrum, and (c) O 1s core level spectrum.

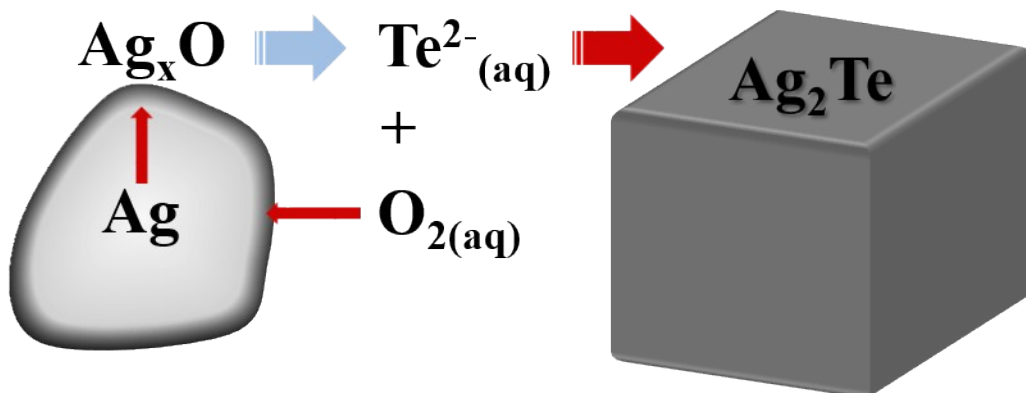

**Fig. S2.** Schematic diagram showing the surface oxidation of Ag particles followed by chemical transformation into  $\text{Ag}_2\text{Te}$  in presence of aqueous Te-precursor solution at room temperature.

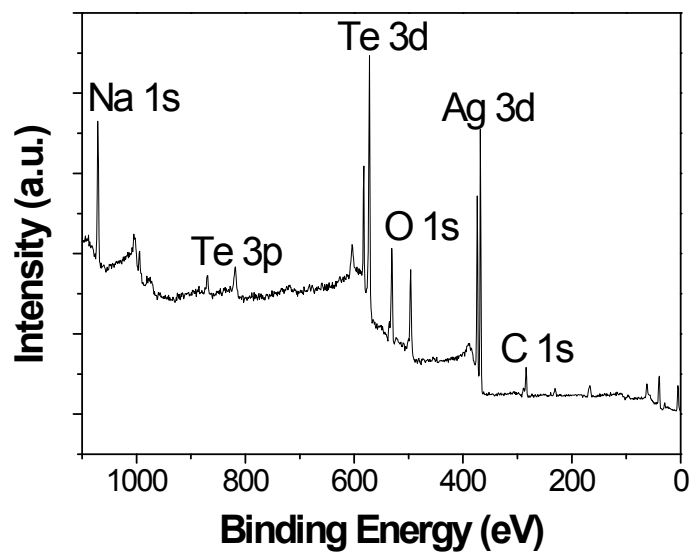

**Fig. S3.** XPS survey spectrum of chemically transformed  $\text{Ag}_2\text{Te}$  film. The Na signal at 1071.12 eV is attributed to residual NaOH.

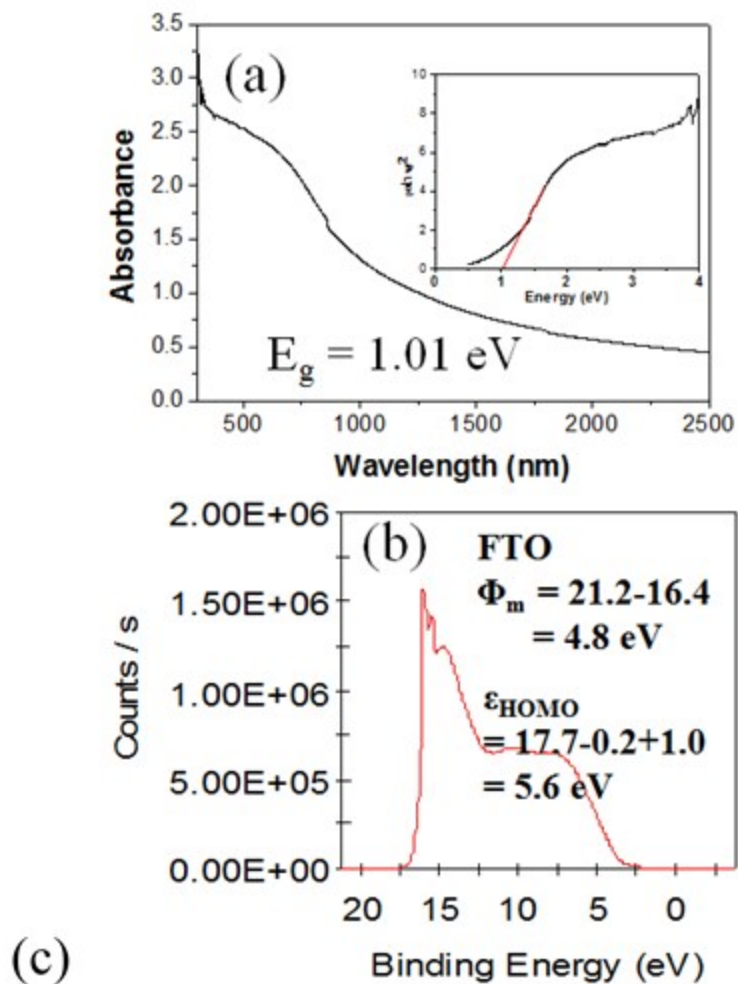

| RESULT                       |                                      |                                  |                                      |
|------------------------------|--------------------------------------|----------------------------------|--------------------------------------|
| Bulk concentration =         | 3.097E+17 [ $\text{J}/\text{Cm}^3$ ] | Sheet Concentration =            | 6.195E+13 [ $\text{J}/\text{Cm}^2$ ] |
| Mobility =                   | 4.779E+1 [ $\text{Cm}^2/\text{Vs}$ ] | Conductivity =                   | 2.371E+0 [ $1/\Omega \text{ Cm}$ ]   |
| Resistivity =                | 4.217E-1 [ $\Omega \text{ Cm}$ ]     | Average Hall Coefficient =       | 2.015E+1 [ $\text{m}^2/\text{C}$ ]   |
| A-C Cross Hall Coefficient = | 1.745E+1 [ $\text{m}^2/\text{C}$ ]   | B-D Cross Hall Coefficient =     | 2.286E+1 [ $\text{m}^2/\text{C}$ ]   |
| Magneto-Resistance =         | 1.070E+1 [ $\Omega$ ]                | Ratio of Vertical / Horizontal = | 2.579E-1                             |

**Fig. S4.** (a) UV-vis absorption spectrum of  $\text{Ag}_2\text{Te}$  film and inset shows the Tauc plot for estimation of optical gap. (b) UPS spectrum for estimation of valence band edge position of  $\text{Ag}_2\text{Te}$  film. (c) Various parameters obtained from Hall measurement of the  $\text{Ag}_2\text{Te}$  film.

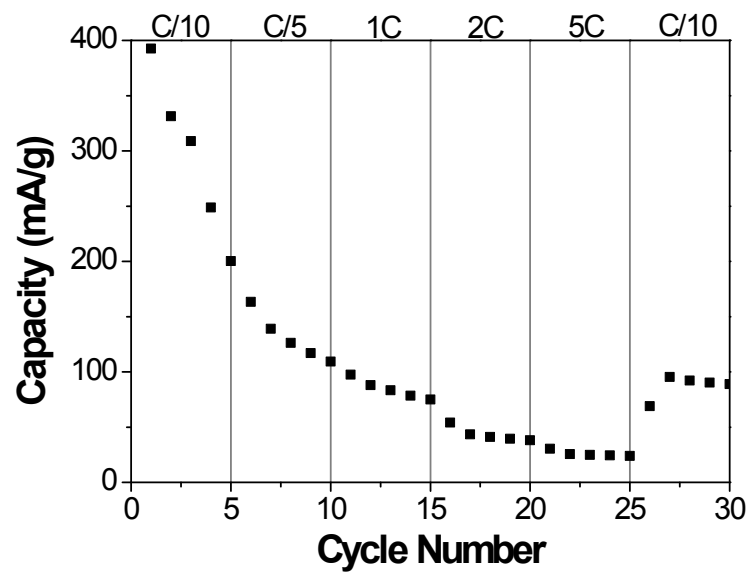

**Fig. S5** Charge–discharge curves of the Li/LiPF<sub>6</sub>/Ag<sub>2</sub>Te battery at various current densities.
